# Supplementary material for: Stereo-Specific Modulation of the Extracellular Calcium-Sensing Receptor in Colon Cancer Cells
Source: MDPI journal article supplement (doi:10.3390/ijms221810124), 2021-09-19
Supplement: s1 [file s1]

Stereo-specific modulation of the extracellular calcium-sensing receptor in colon cancer cells

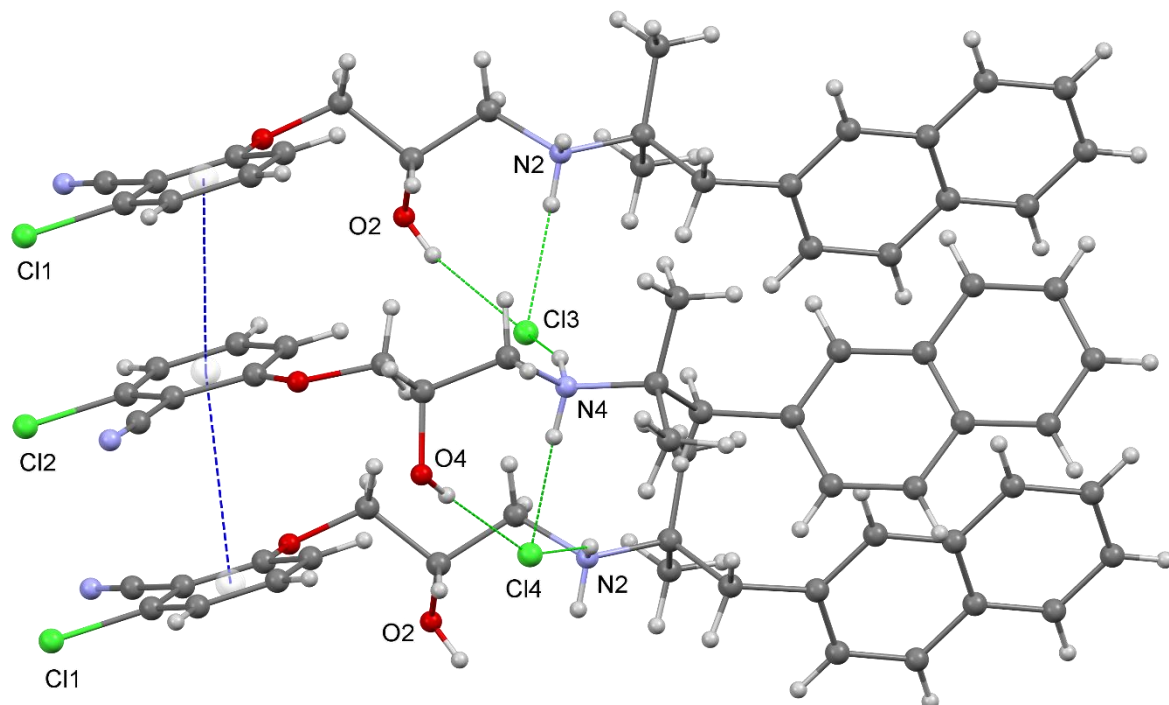

**Figure S1:** Intermolecular  $\pi$ - $\pi$  (blue dotted lines) and hydrogen bonding contacts (green dotted lines) in the crystal structure of NPS S-2143.HCl.

**Table S1:** Selected torsion angles [ $^{\circ}$ ] in the crystal structure of NPS S-2143.HCl.

| (a)            |           | (b)            |           |
|----------------|-----------|----------------|-----------|
| C9-C8-O1-C1    | 79.(25)   | C33-C32-O3-C25 | -168.7(3) |
| O1-C8-C9-O2    | 61.3(5)   | O3-C32-C33-O4  | 67.2(4)   |
| O1-C8-C9-C10   | -178.1(4) | O3-C32-C33-C34 | -165.5(3) |
| C8-C9-C10-N2   | 158.5(4)  | C32-C33-C34-N4 | -65.4(5)  |
| C9-C10-N2-C11  | 152.3(4)  | C33-C34-N4-C35 | -156.4(4) |
| C14-C11-N2-C10 | 174.0(4)  | C38-C35-N4-C34 | -176.3(4) |
| N2-C11-C14-C16 | 169.5(6)  | N4-C35-C38-C40 | -178.0(7) |

**Table S2:** Hydrogen bonding contacts (D = N or O) in the crystal structure of NPS S-2143.HCl.

|              | D...Cl distance/Å | D-H...Cl angle/° |
|--------------|-------------------|------------------|
| N2-H2A...Cl3 | 3.092(4)          | 166.1            |
| N2-H2B...Cl4 | 3.199(4)          | 149.1            |
| N4-H4A...Cl3 | 3.221(4)          | 157.2            |
| N4-H4B...Cl4 | 3.162(3)          | 164.2            |
| O2-H2...Cl3  | 3.256(3)          | 153.2            |
| O4-H4C...Cl4 | 3.205(4)          | 175.1            |
